# An exploratory study of EEG connectivity during the first year of life in preterm and full-term infants

1 Eduardo Gonzalez-Moreira<sup>1</sup>, Deirel Paz-Linares<sup>2,3</sup>, Lourdes Cubero-Rego<sup>1</sup>, Ariosky Areces-  
2 Gonzalez<sup>2,4</sup>, Pedro A. Valdés-Sosa<sup>2,3</sup>, Thalia Harmony<sup>1\*</sup>

3 <sup>1</sup> Unidad de Investigación en Neurodesarrollo, Instituto de Neurobiología, Universidad Nacional  
4 Autónoma de México, Querétaro, México

5 <sup>2</sup> The Clinical Hospital of Chengdu Brain Science Institute, MOE Key Lab for Neuroinformation,  
6 University of Electronic Science and Technology of China, Chengdu, China

7 <sup>3</sup> Cuban Neuroscience Center, La Habana, Cuba

8 <sup>4</sup> Departamento de Informática, Universidad de Pinar del Rio, Pinar del Rio, Cuba

9 \* **Correspondence:** Thalia Harmony

10 [thaliah@unam.mx](mailto:thaliah@unam.mx)

11

12 **Keywords:** electroencephalography, connectivity, neurodevelopment, structured sparse  
13 Bayesian learning, phase-lag index, locally weighted scatterplot smoothing, preterm infant

14

## 15 Abstract

16 Aim: to evaluate EEG connectivity during the first year of age in healthy full-term infants and preterm  
17 infants with prenatal and perinatal risk factors for perinatal brain damage.

18 Methods: Three groups of infants were studied: healthy at full-term infants (n = 71), moderate and late  
19 preterm infants (n = 54), and very preterm infants (n = 56). All preterm infants had perinatal or/and  
20 perinatal risk factors for brain damage. EEG was obtained during phase II of natural NREM sleep.  
21 EEG analysis was performed in 24 segments of 2.56 s free of artifacts. For the calculation of EEG  
22 sources, the spectral Structured Sparse Bayesian Learning (sSSBL) was used. Connectivity was  
23 computed by the phase-lag index.

24 Results: In healthy full-term infants, EEG interhemispheric connectivity in the different frequency  
25 bands followed similar trends with age to those reported in each frequency band: delta connectivity  
26 decreases, theta increases at the end of the year, in the alpha band, different trends were observed  
27 according to the region studied, and beta interhemispheric connectivity decreases with age. EEG  
28 connectivity in preterm infants showed differences from the results of the term group.

29 Discussion: Important structural findings may explain the differences observed in EEG connectivity  
30 between the term and preterm groups.

31 Conclusion: The study of EEG connectivity during the first year of age gives essential information on  
32 normal and abnormal brain development.

### 33 **Introduction**

34 Electroencephalographic brain connectivity in different spectral bands is associated with diverse  
35 mechanisms underlying brain development function (1). Band-specific synchronized  $\alpha$ -spectral-  
36 connectivity is the underlying mechanism for large-scale brain integration of functionally specialized  
37 regions from which coherent behavior and cognition emerge (2–5). This mechanism relies mainly on  
38 the neural architecture and interactions within layers at the microscopic level of description of cortical  
39 columns (6,7). However, in isolation, its topological organization  $\alpha$ -spatial distribution and connectivity  
40 pattern- at the macroscopic level possesses a tremendous descriptive power on the developing brain of  
41 the preterm neonates (8).

42 An essential part in describing the development of neural networks involves mapping its spatial  
43 distribution alone by the localization of responsive areas at the observational level of experimental  
44 techniques, which could be gathered by Magnetic Resonance Imaging (MRI) and  
45 Electroencephalogram (EEG) (9). For either approach, this mapping is indirect. However, the spectral  
46 composition of fMRI signals is severely distorted by the slow metabolic-hemodynamic cascade of the  
47 process following the actual neural activity (10,11). Several MRI studies have shown aberrant  
48 structural characteristics and even abnormal connectivity in preterm infants (12), suggesting white  
49 matter tracts may underlie the neurodevelopmental impairments common in this population. It has also  
50 been suggested that abnormalities in the functional connectivity between the cortex and thalamus  
51 underlie neurocognitive impairments seen after preterm birth (13). The development of thalamocortical  
52 connections and how such development relates to cognitive processes during the earliest stages of life  
53 at ages one and two years have been described during the last decade (14).

54 Furthermore, the thalamus–sensorimotor and thalamus–salience connectivity networks had been  
55 shown to be already present in neonates, whereas the thalamus– medial visual and thalamus–default  
56 mode network connectivity emerged later, at one year of age (14). Also important is the observation  
57 that the working memory performance measured at one and two years of age has significant  
58 correlations with the thalamus–salience network connectivity. Studies have compared the connectivity  
59 between very preterm infants (VPT) and full-term infants (FTI) using MRI procedures (15). They  
60 showed that the most decreased connectivity strength in VPT was the frontotemporal, fronto-limbic,  
61 and posterior cingulate gyrus, at gestational ages of  $39.6 \pm 1.2$  weeks (FTI) and  $40.3 \pm 0.6$  weeks  
62 (VPT).

63 Although many references exist studying structural connectivity by MRI procedures, there is a lack of  
64 references using EEG to measure functional connectivity. EEG recordings in neonates and infants have  
65 shown that quantitative EEG analyses are a reliable and valuable procedure to evaluate functional and  
66 maturational changes (16–18). The study of EEG connectivity is relevant since coherent brain rhythmic  
67 activity plays a role in communication between neural populations engaged in functional and cognitive  
68 processes (19). It has also been shown that neural synchrony plays a role in synaptic plasticity (20).  
69 Therefore, the early study of EEG connectivity in preterm and term infants may give essential  
70 knowledge of brain development. However, EEG signals are affected by their low spatial resolution  
71 and volume conduction effects (21,22). These pitfalls have been tackled by deploying generations of  
72 Electrophysiological Source Imaging (ESI) methods during the last decades (23). ESI methods  
73 combine the best spatial resolution of MRI for the head model estimation with a more excellent time  
74 resolution of EEG for inference of neural activity and connectivity at the brain level (24–28).

## **An exploratory study of EEG connectivity during the first year of life in preterm and full-term infants**

75 The World Health Organization estimates the prevalence of preterm birth to be 5–18% across 184  
76 countries worldwide (29). The causes for premature birth comprise mainly biological, genetic, and  
77 environmental factors (30). Despite advances in prenatal and neonatal care and decreased perinatal  
78 mortality of preterm newborns, the number of survivors with neurological and cognitive deficits  
79 constitutes a public health problem (31). Furthermore, preterm birth is a leading risk factor for (i)  
80 cerebral palsy (32,33), (ii) delayed mental and/or psychomotor development (34,35), (iii) executive  
81 dysfunction (36), (iv) neurosensory disability (37), (v) language and reading deficits (38), (vi)  
82 academic underachievement (39,40), (vii) attention deficit hyperactivity disorder, and (viii) autism  
83 spectrum disorders (12,41).

84 In this work, we focus on the temporal dynamics of neural networks in the millisecond range to study  
85 early neural integration. We present a longitudinal study of EEG connectivity during preterm and full-  
86 term infants' first year of life using a measure based on instantaneous phase differences.

### **87 1 Methods**

88 Ethical permission was granted by the Ethics Committee of the Instituto de Neurobiología of the  
89 Universidad Nacional Autónoma de México, which complies with the Ethical Principles for Medical  
90 Research Involving Human Subjects by the Helsinki Declaration. Informed consent from the parents  
91 was obtained for all study participants.

#### **92 1.1 Participants**

93 Three groups of infants were studied: i) healthy full-term infants without any antecedent for perinatal  
94 brain damage; ii) a group of moderate and late preterm infants with gestational age (GA) between 32  
95 and 37 weeks, and iii) a group of very preterm infants with a GA of 27 to 31 weeks. All preterm babies  
96 had prenatal and/or perinatal risk factors for perinatal brain damage. However, participants with  
97 congenital and hereditary brain malformations, infectious or parasitic diseases were excluded from this  
98 study. After the infants were discharged from the hospital where they were born, their parents were  
99 invited to participate in a unique project of the Neurodevelopmental Research Unit at the Institute of  
100 Neurobiology of the National Autonomous University of Mexico in Queretaro. Information regarding  
101 each group is included in Table 1.

#### **102 1.2 EEG data analysis**

103 EEG was acquired from infants while they were in phase II sleep and were in his/her mother's lap in a  
104 dimly lit room with acoustic isolation. No sedation was used. Referential EEGs recordings for 20  
105 minutes were obtained from 19 electrodes according to the 10/20 system using linked ears as reference.  
106 MEDICID IV System with a gain of 20,000, amplifier bandwidth between 0.5 to 100 Hz, and sample  
107 rate was 200 Hz. Some participants were recorded twice or more times during their first year of life.  
108 Therefore, EEG data were selected from a data set of 297 recordings collected between 2016 and 2020  
109 as part of an ongoing project investigating the characterization of preterm brain development.

110 Later, EEG data was segmented by visual inspection into 24 artifact-free segments of 2.56s duration.  
111 The idea behind this processing was to avoid transforming original data by using preprocessing  
112 techniques like independent component analysis to remove artifacts (eye movement and blinks) or  
113 interpolation to fix “bad” channels. These methods could modify profoundly the connectivity  
114 information relayed on the electrophysiology signal leading us to a wrong interpretation of the data.  
115 The frequency analysis was set up from 0.3 Hz to 20 Hz. After EEG data collection and edition, the

116 data analysis continued with two main steps: inference of EEG source space data using ESI method  
117 and finally, the connectivity analysis based on the phase-lag connectivity measure.

### 118 **1.3 Inference of EEG source space data**

119 ESI methods aim to infer local neural currents based on EEG and MRI data (42,43). However, this  
120 process is subject to distortions due to the system of linear equations being highly ill-conditioned, and  
121 the possible solutions lie within a high-dimensional space. These distortions can indeed reach  
122 unacceptable levels, as shown repeatedly in simulations (21,22,44).

123 In this paper, we estimated the cortical neural activity using a third generation of ESI methods, spectral  
124 Structured Sparse Bayesian Learning (sSSBL) (45). sSSBL pursues estimation of the neural activity  
125 through a maximum “evidence” search via the Expectation-Maximization algorithm (46). Where  
126 evidence is defined as the conditional probabilities of two groups of parameters: (i) variances of  
127 spectral EEG source activity, which controls the statistical relevance of the source cross-spectral  
128 components; and (ii) variances of spectral EEG noise, which controls the level of noise of the  
129 observations.

130 Furthermore, this approach is based on an iterated scheme that produces an approximated  
131 representation of the evidence (expectation) followed by its maximization, guaranteeing convergence  
132 to a local maximum. The maximization step is carried out via estimation formulas of the vector  
133 regression Elastic Net (47) and the Sparse Bayesian Learning (48) through the arithmetic mean of  
134 typical vector regression inputs corresponding to the samples. The global sparsity level is handled by  
135 estimating the regularization parameters in the completely analogous form to the procedure described  
136 by Paz-Linares and collaborators (47).

137 The cortical activity inference was set up on a cortical manifold space defined as 5000 points at the  
138 gray matter, with coordinates on the pediatric MNI brain template (<http://www.bic.mni.mcgill.ca>). The  
139 scalp sensors space was built on 19 electrodes within a 10-20 EEG sensors system (49). The lead fields  
140 were computed by the boundary element method (BEM) integration method accounting for a model of  
141 five head compartments (gray matter, cerebrospinal fluid, inner skull, outer skull, scalp) (50). The  
142 initial cortical surface parcellation based on ninety regions of Tzourio-Mazoyer’s atlas (51) was  
143 manually gathered into five large regions per hemisphere: frontal, sensorimotor, parietal, temporal, and  
144 occipital.

### 145 **1.4 Connectivity analysis through phase-lag based measure**

146 In neuroscience, phase-locking has become the primary measure for neural connectivity to evaluate  
147 the synchronization between neural groups. In this study, we compute the phase-lag index (PLI) (52,53)  
148 between cortical structures. PLI is one of the most popular methods for synchronization inference since  
149 its near “immunity” against the volume conduction effects (54). This approach applies spatial filters to  
150 the EEG data that reduce volume conduction effects leading to the correct interpretation of connectivity  
151 information.

152 In this work, an all-to-all PLI connectivity matrix was computed between the ten cortical regions, five  
153 per hemisphere, at each frequency point from 0.3 Hz to 20 Hz. This procedure resulted in a 3-D matrix  
154 (ROI-ROI-frequency). Finally, the global efficiency was computed to assess the connectivity  
155 information per cortical region and to summarize the connectivity matrices. Efficiency is based on the  
156 inverse of the average distance from each vertex (ROI) to any other vertex (path lengths), which  
157 explains that higher efficiency values correspond to more direct connections. Furthermore, global

## **An exploratory study of EEG connectivity during the first year of life in preterm and full-term infants**

158 efficiency has been proved to be helpful to evaluate pathological networks since its robust again  
159 networks that are not fully connected (55,56).

### **160 1.5 Statistical analysis**

161 For the statistical analysis, a 3-D efficiency matrix (ROI-frequency-age) was created for each group  
162 under analysis. One point to note is that our data did not cover every age value between 0 and 1 year.  
163 Figure 1 shows some small gaps in the age distribution of each group. To solve this pitfall and to  
164 estimate with more critical details the development connectivity surfaces along the first year of life, a  
165 locally weighted scatterplot smoothing (LOWESS) method was applied (57). The LOWESS approach  
166 overcomes classical methods through a linear and no linear least squares regression. This regression  
167 fits simple models with subsets of the data to build up a function that describes the deterministic part  
168 of the variation in the data instead of requiring a global function to fit a model to the entire data. Later,  
169 we compute a linear regression model for each row of the development connectivity surface to evaluate  
170 the connectivity behavior for each frequency value along the first year of life. The slope-based curve  
171 provides evidence to compare the connectivity develop for the three groups under analysis.

## **172 2 Results**

173 The results of the LOWESS approach for global efficiency measure in full-term and preterm infants  
174 are shown in Figure 2. In this figure, the term group shows a decrease of the connectivity with age in  
175 the frequencies within the delta band (0.5 Hz - 3.0 Hz), whereas, in both groups of preterm infants, an  
176 increase is observed. Connectivity in the theta and alpha bands decreases in the three groups. In the  
177 low beta band, EEG connectivity increases in term and very preterm groups and decreases in the  
178 moderate and late preterm group. Connectivity at frequencies at 15 and above Hz decreases in all  
179 groups. As it is difficult to interpret the results of the global power of the connectivity, and almost all  
180 references have studied the interhemispheric connectivity, we present the results of the  
181 interhemispheric connectivity for each cortical region under analysis.

### **182 2.1 Left-right frontal connectivity (LRFC)**

183 Results of the LRFC are shown in Figure 3. In the delta band, LRFC tended to decrease, although at  
184 age 0.1 years (36.5 days) different connectivity values are observed for the different frequencies in the  
185 delta band. In the moderate and late preterm, this interhemispheric delta connectivity decreases,  
186 although at 0.5 Hz - 1.0 Hz is possible to observe an increase with age. In the very preterm group, the  
187 decrease in interhemispheric frontal connectivity with increasing age is evident. LRFC in the theta  
188 band showed in term subjects an increase with age. Meanwhile, in the moderate and late preterm, there  
189 was a decrease in connectivity with age that was even more marked in the very preterm group. LRFC  
190 in the alpha band in term and moderate and late preterm decreased with age. As this band of frequency  
191 decreased in power, the result was expected. However, there were differences in the trend of  
192 connectivity between groups in the beta band: term infants had a decreasing trend during the first year  
193 of life, but both groups of preterm infants showed increasing values with age.

### **194 2.2 Left-right sensorimotor connectivity (LRSC)**

195 Results are shown in Figure 4. LRSC in the delta band in term infants decreases during the first six  
196 months of age, and later on, it increases. At the end of the first year, this increase was also observed in  
197 moderate and late preterm and with great intensity in the very preterm. This last group also showed  
198 this increase in LRSC at frequencies in the theta band; meanwhile, a decrease in LRSC was observed  
199 in infants at term and in moderate and late preterm. It was possible to see a constant increase in the

200 range of 5-8 Hz in term infants. This may be corresponding to a rhythmical central activity that has  
201 been reported as a precursor of the mu or sensorimotor rhythm (58). Moderate and late preterm showed  
202 a decrease in theta connectivity, and in very preterm, this activity has a constant decrease. In the alpha  
203 band, LRSC decrease with age in term and moderate and late preterm. In both groups at three months,  
204 there was robust alpha connectivity that decreased slowly. However, in the very preterm, there was a  
205 substantial decrease during the whole year. Around 15 Hz LRSC decreased during the whole year in  
206 term and very preterm infants, and an unexpected increase at the end of the year was present in the  
207 moderate and late preterm.

### 208 **2.3 Left-right parietal connectivity (LRPC)**

209 Results of the LRPC are shown in Figure 5. LRPC in term infants shows a decrease with age in all  
210 frequencies between 5 Hz and 10 Hz. However, in moderate and late preterm LRPC in the delta  
211 frequencies and the band from 6 Hz to 10 Hz shows high values at age 3.65 months that progressively  
212 decrease with age. In this group, connectivity from 11 Hz to 18 Hz decreases, but connectivity increases  
213 with age at the end of the year.

### 214 **2.4 Left-right temporal connectivity (LRTC)**

215 Figure 6 shows the results of LRTC. In the delta band, this connectivity at three months is robust,  
216 decreases with age in term infants. Moderate and late preterm, and very preterm infants, shown a  
217 reverse trend, increasing with age. In term infants' LRTC at frequencies from 6 to 8 Hz increases  
218 during the year. At 10 Hz to 12 Hz, LRTC decreases with age up to 6 months and later increases. LRTC  
219 at frequencies within the beta band decreases with age in term infants. LRTC in both preterm groups  
220 decreases with age from 10 Hz to 18 Hz.

### 221 **2.5 Left-right occipital connectivity (LROC)**

222 In Figure 7, the results for LROC are shown. Full-term infants showed a progressive decrease with age  
223 in frequencies of the delta band. In the alpha band, connectivity decreased during the first six months  
224 and increased in the last six months of the year. Late and moderate preterm and very preterm infants  
225 showed a completely different connectivity behavior across the first year of age.

## 226 **3 Discussion**

227 In our work, EEG connectivity in preterm infants was described. However, most papers reporting  
228 preterm brain connectivity use magnetic resonance images (30,59–61), and prominent differences  
229 between networks identified in term control versus premature infants at term equivalent have been  
230 described (62). These authors also reported that putative precursors of the default mode network were  
231 detected in term control infants but were not identified in preterm infants, including those at term  
232 equivalent. In a follow-up of preterm children at seven years, (63) demonstrated that children born very  
233 preterm have less connected and less complex brain networks compared with typically developing  
234 term-born children and that even these structural abnormalities are observed in a follow-up of seven  
235 years. The structural information about the connectivity observed in preterm infants demonstrates  
236 alterations related to motor, linguistic and cognitive deficits (64). All this information was the basis for  
237 studying the EEG connectivity in preterm infants.

238 The pioneer studies of (65) reported EEG coherence from eight left and eight right intrahemispheric  
239 electrode pairs from 253 children ranging in mean age from 6 months to 7 years. The results support  
240 the view that the functions of the left and right hemispheres are established early in human development

## **An exploratory study of EEG connectivity during the first year of life in preterm and full-term infants**

241 through complementary developmental sequences. These sequences appear to recapitulate differences  
242 in adult hemispheric function. However, posterior studies in infants have mainly analyzed the  
243 correlation between homologous left and right hemispheres.

244 Previous studies analyzing the correlation between homologous left and right hemispheres (66)  
245 described that the median correlation value decreased significantly (between -40% and -60% decrease)  
246 in infants from 27 to 37 weeks of gestational age. For postnatal maturation, only the central-temporal  
247 channel showed a decreasing trend. These authors conclude that the decreasing median correlation  
248 values in all homologous channels indicate a decrease in similarity in signal shape with advancing  
249 gestational age. González et al., in 2011 studied EEG inter and intrahemispheric connectivity  
250 measuring coherence between regions and the measure of phase synchronization (67). They found  
251 significant differences between term and preterm infants during active and quiet sleep, with term  
252 infants with greater magnitude values of coherence than preterm infants. The interhemispheric PLI  
253 values were different during active sleep between term and preterm infants in the delta band.

254 Similarly, the intrahemispheric PLI values in the beta band differed between term and preterm infants  
255 during quiet sleep. Our results showed that term infants have different results during quiet sleep than  
256 preterm infants in EEG connectivity in all frequency bands. The data go through two main steps:  
257 inference of EEG source space data using a novel ESI method and finally, the connectivity analysis  
258 based on the phase-lag connectivity measure. Differences in the EEG analysis may explain the  
259 contradiction with González results.

260 Significant structural findings may explain the differences observed in EEG connectivity between the  
261 term and preterm groups. The corpus callosum (CC), is the anatomic structure that has axons is an  
262 anatomical structure constituted by axons connecting homologous cortical regions. A rapid growth in  
263 its volume occurs during the first 20 months of age (68). The midsagittal area of the CC has been  
264 commonly used as a sensitive marker of brain development and maturation since the CC area is related  
265 to the number of axons and morphology, such as axon diameter and myelination (69). On the other  
266 hand, the development of the corpus callosum in preterm infants is affected by prematurity (70), and  
267 in preterm infants, the decrease of its volume is frequently observed (71,72). This structural  
268 abnormality may explain many differences noted between term and preterm infants in the  
269 interhemispheric EEG connectivity, which we consider the leading cause of the results obtained.

270 Another important aspect is that cortical synaptogenesis has a different pattern of development of the  
271 cortex, with a more rapid increase in the auditory cortex than the prefrontal cortex (73), which may  
272 explain the asynchrony of cortical maturation in the infant's brain (74). These facts, together with the  
273 maturational process of myelination that shows that it ends at a different time in different regions: the  
274 auditory and visual cortex myelination ends at 18-24 months, whereas in the Broca's area, it ends at  
275 five years and in the prefrontal cortex at nine years of age (75). These statements may produce essential  
276 differences in the topography of EEG connectivity along the first year of age. On the other hand,  
277 myelination in preterm babies is severely affected since MRI studies have shown that diffuse white  
278 matter injury is one of the most frequent abnormalities observed in preterm infants (76). The structural  
279 differences between term and preterm babies strongly support the differences observed between this  
280 group in EEG connectivity.

281 In the group of term infants, the results obtained may be explained by the studies of EEG development  
282 in normal infants (77). In all regions studied, the EEG connectivity in the delta band decreased with  
283 age. EEG development in this frequency band has also shown a decrease with age, which may explain  
284 the results observed in the connectivity. The EEG connectivity in the theta band shows differences in

285 development according to the region study. LRFC showed a significant increase with age which is  
286 consistent with the observation that at term infant's theta absolute and relative power in frontal leads  
287 increase during the first year (77). LRTC also showed an increase at the end of the year, which also  
288 coincided with the EEG neurodevelopmental findings.

289 In the range from 5 Hz to 8 Hz in full-term infants, it was possible to see in LRFC a constant increase,  
290 as well as in LRTC and LRSC. This may be corresponding to a rhythmical central activity that has  
291 been reported as a precursor of the mu or sensorimotor rhythm (58). The moderate and late preterm  
292 group showed a decrease in connectivity, and in the very preterm group, this activity has a constant  
293 decrease. Our finding is consistent with (78). There a clear sensorimotor rhythm is described in the  
294 range of 5.47-7.03 Hz with contralateral activity to free movement in awake at full-term infants around  
295 the four months of life. Furthermore, there the preterm infant group with periventricular leukomalacia  
296 did not show any electroencephalographic sign of the presence of this rhythm.

297 In the alpha band, EEG connectivity in term infants has a different trend in the different regions. In  
298 frontal, temporal, and sensorimotor regions, the interhemispheric connectivity decreases with age  
299 during the whole year. However, LPOC showed at the early months a sharp decrease that changed to  
300 a progressive increase in the second semester of the year. This changing trend was not detected in the  
301 studies of EEG development, maybe because they have used linear regression for the analysis (77).

302 EEG beta band connectivity decreases in all regions. Our results were limited to a small range of  
303 frequencies, from 13 to 20 Hz. Therefore, it is difficult to compare with studies of EEG development  
304 of other references.

#### 305 **4 Conclusions**

306 Our exploratory study of EEG connectivity between left and right cortical areas in healthy at full-term  
307 infants during the first year of age showed a similar trend that has been reported by the different  
308 frequency bands in similar groups of healthy full-term infants. EEG interhemispheric connectivity in  
309 all preterm infants studied with a gestational age from 26 to 37 weeks and prenatal and perinatal risk  
310 factors for brain damage has great differences with the group of healthy at full-term infants. Such  
311 differences in EEG connectivity may be due to the structural brain abnormalities that have been  
312 described in preterm infants.

#### 313 **5 Conflict of Interest**

314 The authors declare that the research was conducted in the absence of any commercial or financial  
315 relationships that could be construed as a potential conflict of interest.

#### 316 **6 Author Contributions**

317 The Author Contributions section is mandatory for all articles, including articles by sole authors. If an  
318 appropriate statement is not provided on submission, a standard one will be inserted during the  
319 production process. The Author Contributions statement must describe the contributions of individual  
320 authors referred to by their initials and, in doing so, all authors agree to be accountable for the content  
321 of the work. Please see [here](#) for full authorship criteria.

#### 322 **7 Funding**



## An exploratory study of EEG connectivity during the first year of life in preterm and full-term infants

323 This study was partially supported by DGAPA PAPIIT IN205520 from the Universidad Nacional  
324 Autónoma de México.

### 325 **8 Acknowledgments**

326 This work received support from Luis Aguilar, Alejandro de León, and Jair García from Laboratorio  
327 Nacional de Visualización Científica Avanzada. Also, the authors would like to thank colleagues  
328 Hector Belmont, María Elizabeth Monica Carlier, Manuel Hinojosa-Rodríguez and María Elena Juárez  
329 for their support during data collection.

### 330 **9 References**

- 331 1. Brookes MJ, O'Neill GC, Hall EL, Woolrich MW, Baker A, Palazzo Corner S, et al.  
332 Measuring temporal, spectral and spatial changes in electrophysiological brain network  
333 connectivity. *NeuroImage* [Internet]. 2014 May;91:282–99. Available from:  
334 <https://linkinghub.elsevier.com/retrieve/pii/S1053811914000123>
- 335 2. Engel AK, Fries P, Singer W. Dynamic predictions: Oscillations and synchrony in top–down  
336 processing. *Nature Reviews Neuroscience* [Internet]. 2001 Oct;2(10):704–16. Available from:  
337 <http://www.nature.com/articles/35094565>
- 338 3. Varela F, Lachaux J-P, Rodriguez E, Martinerie J. The brainweb: Phase synchronization and  
339 large-scale integration. *Nature Reviews Neuroscience* [Internet]. 2001 Apr [cited 2021 Oct  
340 11];2(4):229–39. Available from: <http://www.nature.com/articles/35067550>
- 341 4. Nunez PL, Srinivasan R. *Electric Fields of the Brain* [Internet]. Oxford University Press; 2006.  
342 Available from:  
343 [https://oxford.universitypressscholarship.com/view/10.1093/acprof:oso/9780195050387.001.0](https://oxford.universitypressscholarship.com/view/10.1093/acprof:oso/9780195050387.001.0001/acprof-9780195050387)  
344 [001/acprof-9780195050387](https://oxford.universitypressscholarship.com/view/10.1093/acprof:oso/9780195050387.001.0001/acprof-9780195050387)
- 345 5. Vidaurre D, Abeysuriya R, Becker R, Quinn AJ, Alfaro-Almagro F, Smith SM, et al.  
346 Discovering dynamic brain networks from big data in rest and task. *NeuroImage* [Internet].  
347 2018 Oct 15;180:646–56. Available from:  
348 <https://linkinghub.elsevier.com/retrieve/pii/S1053811917305487>
- 349 6. Freeman WJ. Mass action in the nervous system [Internet]. 1975. Available from:  
350 [www.ccs.fau.edu/~bressler/EDU/NTSA/References/MASS](http://www.ccs.fau.edu/~bressler/EDU/NTSA/References/MASS)
- 351 7. Jirsa VK, Haken H. A derivation of a macroscopic field theory of the brain from the quasi-  
352 microscopic neural dynamics. *Physica D: Nonlinear Phenomena* [Internet]. 1997  
353 Jan;99(4):503–26. Available from:  
354 <https://linkinghub.elsevier.com/retrieve/pii/S0167278996001662>
- 355 8. Wilson-Costello D, Friedman H, Minich N, Fanaroff AA, Hack M. Improved survival rates  
356 with increased neurodevelopmental disability for extremely low birth weight infants in the  
357 1990s. *Pediatrics*. 2005 Apr;115(4):997–1003.
- 358 9. Mantini D, Perrucci MG, del Gratta C, Romani GL, Corbetta M. Electrophysiological  
359 signatures of resting state networks in the human brain. *Proceedings of the National Academy*

- 360 of Sciences [Internet]. 2007 Aug 7;104(32):13170–5. Available from:  
361 <http://www.pnas.org/cgi/doi/10.1073/pnas.0700668104>
- 362 10. Buxton RB, Wong EC, Frank LR. Dynamics of blood flow and oxygenation changes during  
363 brain activation: The balloon model. *Magnetic Resonance in Medicine* [Internet]. 1998  
364 Jun;39(6):855–64. Available from:  
365 <https://onlinelibrary.wiley.com/doi/10.1002/mrm.1910390602>
- 366 11. Logothetis NK, Pauls J, Augath M, Trinath T, Oeltermann A. Neurophysiological  
367 investigation of the basis of the fMRI signal. *Nature* [Internet]. 2001 Jul;412(6843):150–7.  
368 Available from: <http://www.nature.com/articles/35084005>
- 369 12. Rogers CE, Lean RE, Wheelock MD, Smyser CD. Aberrant structural and functional  
370 connectivity and neurodevelopmental impairment in preterm children. *Journal of*  
371 *Neurodevelopmental Disorders* [Internet]. 2018 Dec 13;10(1):38. Available from:  
372 <https://jneurodevdisorders.biomedcentral.com/articles/10.1186/s11689-018-9253-x>
- 373 13. Toulmin H, O’Muircheartaigh J, Counsell SJ, Falconer S, Chew A, Beckmann CF, et al.  
374 Functional thalamocortical connectivity at term equivalent age and outcome at 2 years in  
375 infants born preterm. *Cortex* [Internet]. 2021 Feb 1;135:17–29. Available from:  
376 <https://linkinghub.elsevier.com/retrieve/pii/S001094522030366X>
- 377 14. Alcauter S, Lin W, Smith JK, Short SJ, Goldman BD, Reznick JS, et al. Development of  
378 Thalamocortical Connectivity during Infancy and Its Cognitive Correlations. *Journal of*  
379 *Neuroscience* [Internet]. 2014 Jul 2;34(27):9067–75. Available from:  
380 <https://www.jneurosci.org/lookup/doi/10.1523/JNEUROSCI.0796-14.2014>
- 381 15. Sa de Almeida J, Meskaldji D-E, Loukas S, Lordier L, Gui L, Lazeyras F, et al. Preterm birth  
382 leads to impaired rich-club organization and fronto-paralimbic/limbic structural connectivity in  
383 newborns. *NeuroImage* [Internet]. 2021 Jan 15;225:117440. Available from:  
384 <https://linkinghub.elsevier.com/retrieve/pii/S1053811920309253>
- 385 16. Niemarkt HJ, Andriessen P, Peters CHL, Pasma JW, Zimmermann LJ, Bambang Oetomo S.  
386 Quantitative analysis of maturational changes in EEG background activity in very preterm  
387 infants with a normal neurodevelopment at 1 year of age. *Early Human Development*  
388 [Internet]. 2010 Apr;86(4):219–24. Available from:  
389 <https://linkinghub.elsevier.com/retrieve/pii/S0378378210000629>
- 390 17. Niemarkt HJ, Jennekens W, Pasma JW, Katgert T, van Pul C, Gavilanes AWD, et al.  
391 Maturational Changes in Automated EEG Spectral Power Analysis in Preterm Infants.  
392 *Pediatric Research* [Internet]. 2011 Nov;70(5):529–34. Available from:  
393 <http://www.nature.com/doi/10.1203/PDR.0b013e31822d748b>
- 394 18. Schaworonkoff N, Voytek B. Longitudinal changes in aperiodic and periodic activity in  
395 electrophysiological recordings in the first seven months of life. *Developmental Cognitive*  
396 *Neuroscience* [Internet]. 2021 Feb 1;47:100895. Available from:  
397 <https://linkinghub.elsevier.com/retrieve/pii/S1878929320301420>

**An exploratory study of EEG connectivity during the first year of life in preterm and full-term infants**

- 398 19. Wang X-J. Neurophysiological and Computational Principles of Cortical Rhythms in  
399 Cognition. *Physiological Reviews* [Internet]. 2010 Jul;90(3):1195–268. Available from:  
400 <https://www.physiology.org/doi/10.1152/physrev.00035.2008>
- 401 20. Uhlhaas PJ, Roux F, Rodriguez E, Rotarska-Jagiela A, Singer W. Neural synchrony and the  
402 development of cortical networks. Vol. 14, *Trends in Cognitive Sciences*. 2010. p. 72–80.
- 403 21. Haufe S, Nikulin V v., Müller K-R, Nolte G. A critical assessment of connectivity measures  
404 for EEG data: A simulation study. *NeuroImage* [Internet]. 2013 Jan 1;64(1):120–33. Available  
405 from: <https://linkinghub.elsevier.com/retrieve/pii/S1053811912009469>
- 406 22. van de Steen F, Faes L, Karahan E, Songsiri J, Valdes-Sosa PA, Marinazzo D. Critical  
407 Comments on EEG Sensor Space Dynamical Connectivity Analysis. *Brain Topography*  
408 [Internet]. 2019 Jul 30;32(4):643–54. Available from:  
409 <http://link.springer.com/10.1007/s10548-016-0538-7>
- 410 23. Gonzalez-Moreira E, Paz-Linares D, Areces-Gonzalez A, Wang R, Valdes-Sosa PA. Third  
411 Generation MEEG Source Connectivity Analysis Toolbox (BC-VARETA 1.0) and Validation  
412 Benchmark. 2018 Oct 26; Available from: <http://arxiv.org/abs/1810.11212>
- 413 24. Hämaläinen MS, Ilmoniemi RJ. Interpreting magnetic fields of the brain: minimum norm  
414 estimates. *Medical & Biological Engineering & Computing*. 1994;32(1):35–42.
- 415 25. Pascual-marqui RD. Review of Methods for Solving the EEG Inverse Problem. 1999;1(1):75–  
416 86.
- 417 26. Srinivasan R. Methods to Improve the Spatial Resolution of EEG [Internet]. Vol. 1,  
418 INTERNATIONAL JOURNAL OF BIOELECTROMAGNETISM. 1999. Available from:  
419 [www.tut.fi/ijbem/](http://www.tut.fi/ijbem/)
- 420 27. Babiloni F, Cincotti F, Carducci F, Rossini PM, Babiloni C. Spatial enhancement of EEG data  
421 by surface Laplacian estimation: the use of magnetic resonance imaging-based head models.  
422 *Clinical Neurophysiology* [Internet]. 2001 May;112(5):724–7. Available from:  
423 <https://linkinghub.elsevier.com/retrieve/pii/S1388245701004941>
- 424 28. He B, Astolfi L, Valdes-Sosa PA, Marinazzo D, Palva SO, Benar C-G, et al.  
425 Electrophysiological Brain Connectivity: Theory and Implementation. *IEEE Transactions on*  
426 *Biomedical Engineering* [Internet]. 2019 Jul 1;66(7):2115–37. Available from:  
427 <https://ieeexplore.ieee.org/document/8708690/>
- 428 29. WHO. World health organization report about preterm birth [Internet]. 2018 [cited 2021 Oct  
429 17]. Available from: <http://www.who.int/en/news-room/fact-sheets/detail/preterm-birth>
- 430 30. Gao W, Lin W, Grewen K, Gilmore JH. Functional Connectivity of the Infant Human Brain.  
431 *The Neuroscientist* [Internet]. 2017 Apr 7;23(2):169–84. Available from:  
432 <http://journals.sagepub.com/doi/10.1177/1073858416635986>
- 433 31. Volpe JJ. Brain injury in premature infants: a complex amalgam of destructive and  
434 developmental disturbances. *The Lancet Neurology* [Internet]. 2009 Jan;8(1):110–24.  
435 Available from: <https://linkinghub.elsevier.com/retrieve/pii/S1474442208702941>

**An exploratory study of EEG connectivity during the first year of life in preterm and full-term infants**

- 436 32. Himpens E, van den Broeck C, Oostra A, Calders P, Vanhaesebrouck P. Prevalence, type,  
437 distribution, and severity of cerebral palsy in relation to gestational age: a meta-analytic  
438 review. *Developmental Medicine & Child Neurology* [Internet]. 2008 May;50(5):334–40.  
439 Available from: <https://onlinelibrary.wiley.com/doi/10.1111/j.1469-8749.2008.02047.x>
- 440 33. Spittle AJ, Morgan C, Olsen JE, Novak I, Cheong JLY. Early Diagnosis and Treatment of  
441 Cerebral Palsy in Children with a History of Preterm Birth. *Clinics in Perinatology* [Internet].  
442 2018 Sep 1;45(3):409–20. Available from:  
443 <https://linkinghub.elsevier.com/retrieve/pii/S0095510818313708>
- 444 34. Stoelhorst GMSJ, Rijken M, Martens SE, van Zwieten PHT, Feenstra J, Zwinderman AH, et  
445 al. Developmental outcome at 18 and 24 months of age in very preterm children: a cohort  
446 study from 1996 to 1997. *Early Human Development* [Internet]. 2003 Jun;72(2):83–95.  
447 Available from: <https://linkinghub.elsevier.com/retrieve/pii/S0378378203000112>
- 448 35. van Beek PE, van der Horst IE, Wetzer J, van Baar AL, Vugs B, Andriessen P. Developmental  
449 Trajectories in Very Preterm Born Children Up to 8 Years: A Longitudinal Cohort Study.  
450 *Frontiers in Pediatrics* [Internet]. 2021 May 10;9. Available from:  
451 <https://www.frontiersin.org/articles/10.3389/fped.2021.672214/full>
- 452 36. Woodward LJ, Edgin JO, Thompson D, Inder TE. Object working memory deficits predicted  
453 by early brain injury and development in the preterm infant. *Brain* [Internet]. 2005 Nov  
454 1;128(11):2578–87. Available from:  
455 [http://academic.oup.com/brain/article/128/11/2578/339575/Object-working-memory-deficits-](http://academic.oup.com/brain/article/128/11/2578/339575/Object-working-memory-deficits-predicted-by-early)  
456 [predicted-by-early](http://academic.oup.com/brain/article/128/11/2578/339575/Object-working-memory-deficits-predicted-by-early)
- 457 37. Leversen KT, Sommerfelt K, Rønnestad A, Kaaresen PI, Farstad T, Skranes J, et al. Predicting  
458 neurosensory disabilities at two years of age in a national cohort of extremely premature  
459 infants. *Early Human Development* [Internet]. 2010 Sep;86(9):581–6. Available from:  
460 <https://linkinghub.elsevier.com/retrieve/pii/S0378378210001829>
- 461 38. Lee ES, Yeatman JD, Luna B, Feldman HM. Specific language and reading skills in school-  
462 aged children and adolescents are associated with prematurity after controlling for IQ.  
463 *Neuropsychologia* [Internet]. 2011 Apr;49(5):906–13. Available from:  
464 <https://linkinghub.elsevier.com/retrieve/pii/S0028393210005828>
- 465 39. Aylward GP. Neurodevelopmental Outcomes of Infants Born Prematurely. *Journal of*  
466 *Developmental & Behavioral Pediatrics* [Internet]. 2014 Jul;35(6):394–407. Available from:  
467 <https://journals.lww.com/00004703-201407000-00007>
- 468 40. Mangin KS, Horwood LJ, Woodward LJ. Cognitive Development Trajectories of Very  
469 Preterm and Typically Developing Children. *Child Development* [Internet]. 2017 Jan  
470 1;88(1):282–98. Available from: <https://onlinelibrary.wiley.com/doi/10.1111/cdev.12585>
- 471 41. Carmo ALS do, Fredo FW, Bruck I, Lima J do RM de, Janke RNRGH, Fogaça T da GM, et al.  
472 Neurological, cognitive and learning evaluation of students who were born preterm. *Revista*  
473 *Paulista de Pediatria* [Internet]. 2022;40:e2020252. Available from:  
474 [http://www.scielo.br/scielo.php?script=sci\\_arttext&pid=S0103-05822022000100406&tlng=en](http://www.scielo.br/scielo.php?script=sci_arttext&pid=S0103-05822022000100406&tlng=en)

**An exploratory study of EEG connectivity during the first year of life in preterm and full-term infants**

- 475 42. Nunez PL, Silberstein RB, Cadusch PJ, Wijesinghe RS, Westdorp AF, Srinivasan R. A  
476 theoretical and experimental study of high resolution EEG based on surface Laplacians and  
477 cortical imaging. *Electroencephalography and Clinical Neurophysiology* [Internet]. 1994  
478 Jan;90(1):40–57. Available from:  
479 <https://linkinghub.elsevier.com/retrieve/pii/0013469494901120>
- 480 43. Burle B, Spieser L, Roger C, Casini L, Hasbroucq T, Vidal F. Spatial and temporal resolutions  
481 of EEG: Is it really black and white? A scalp current density view. *International Journal of*  
482 *Psychophysiology*. 2015 Sep 1;97(3):210–20.
- 483 44. Colclough GL, Brookes MJ, Smith SM, Woolrich MW. NeuroImage A symmetric  
484 multivariate leakage correction for MEG connectomes. *NeuroImage* [Internet]. 2015;117:439–  
485 48. Available from: <http://dx.doi.org/10.1016/j.neuroimage.2015.03.071>
- 486 45. Paz-Linares D, Gonzalez-Moreira E, Areces-Gonzalez A, Li M, Wang Y, Gonzalez-Mitjans A,  
487 et al. DISTORTIONLESS ESTIMATION OF EEG CORTICAL SPECTRAL  
488 TOPOGRAPHIES USING SPECTRAL STRUCTURED SPARSE BAYESIAN LEARNING.  
489 Vol. xx, *IEEE TRANSACTIONS ON MEDICAL IMAGING*. 2021.
- 490 46. Paz-Linares D, Gonzalez-Moreira E, Martinez-Montes E, Valdes-Hernandez PA, Bosch-  
491 Bayard J, Bringas-Vega ML, et al. Caulking the “leakage effect” in MEEG source connectivity  
492 analysis. arXiv. 2018.
- 493 47. Paz-Linares D, Vega-Hernández M, Rojas-López PA, Valdés-Hernández PA, Martínez-  
494 Montes E, Valdés-Sosa PA. Spatio Temporal EEG Source Imaging with the Hierarchical  
495 Bayesian Elastic Net and Elitist Lasso Models. *Frontiers in Neuroscience* [Internet]. 2017 Nov  
496 16;11(NOV). Available from:  
497 <http://journal.frontiersin.org/article/10.3389/fnins.2017.00635/full>
- 498 48. Wipf D, Nagarajan S. A unified Bayesian framework for MEG/EEG source imaging.  
499 *NeuroImage* [Internet]. 2009 Feb 1;44(3):947–66. Available from:  
500 <https://linkinghub.elsevier.com/retrieve/pii/S1053811908001870>
- 501 49. Oostenveld R, Praamstra P. The five percent electrode system for high-resolution EEG and  
502 ERP measurements. *Clinical Neurophysiology* [Internet]. 2001 Apr;112(4):713–9. Available  
503 from: <https://linkinghub.elsevier.com/retrieve/pii/S1388245700005277>
- 504 50. Fuchs M, Kastner J, Wagner M, Hawes S, Ebersole JS. A standardized boundary element  
505 method volume conductor model. *Clinical Neurophysiology* [Internet]. 2002 May;113(5):702–  
506 12. Available from: <https://linkinghub.elsevier.com/retrieve/pii/S1388245702000305>
- 507 51. Tzourio-Mazoyer N, Landeau B, Papathanassiou D, Crivello F, Etard O, Delcroix N, et al.  
508 Automated Anatomical Labeling of Activations in SPM Using a Macroscopic Anatomical  
509 Parcellation of the MNI MRI Single-Subject Brain. *NeuroImage* [Internet]. 2002  
510 Jan;15(1):273–89. Available from:  
511 <https://linkinghub.elsevier.com/retrieve/pii/S1053811901909784>
- 512 52. Stam CJ, Nolte G, Daffertshofer A. Phase lag index: Assessment of functional connectivity  
513 from multi channel EEG and MEG with diminished bias from common sources. *Human Brain*

- 514 Mapping [Internet]. 2007 Nov;28(11):1178–93. Available from:  
515 <https://onlinelibrary.wiley.com/doi/10.1002/hbm.20346>
- 516 53. Vinck M, Oostenveld R, van Wingerden M, Battaglia F, Pennartz CMA. An improved index  
517 of phase-synchronization for electrophysiological data in the presence of volume-conduction,  
518 noise and sample-size bias. *NeuroImage*. 2011 Apr 15;55(4):1548–65.
- 519 54. Cohen MX. *Analyzing neural time series data: Theory and practice*. 2014.
- 520 55. Achard S, Bullmore E. Efficiency and Cost of Economical Brain Functional Networks. Friston  
521 KJ, editor. *PLoS Computational Biology* [Internet]. 2007 Feb 2;3(2):e17. Available from:  
522 <https://dx.plos.org/10.1371/journal.pcbi.0030017>
- 523 56. Wozniak JR, Mueller BA, Bell CJ, Muetzel RL, Hoecker HL, Boys CJ, et al. Global functional  
524 connectivity abnormalities in children with fetal alcohol spectrum disorders. *Alcoholism,*  
525 *clinical and experimental research* [Internet]. 2013 May;37(5):748–56. Available from:  
526 <http://www.ncbi.nlm.nih.gov/pubmed/23240997>
- 527 57. Cleveland WS, Devlin SJ. Locally Weighted Regression: An Approach to Regression Analysis  
528 by Local Fitting Locally Weighted Regression: An Approach to Regression Analysis by Local  
529 Fiting. Vol. 83, Source: *Journal of the American Statistical Association*. 1988.
- 530 58. Dereymaeker A, Pillay K, Vervisch J, de Vos M, van Huffel S, Jansen K, et al. Review of  
531 sleep-EEG in preterm and term neonates. *Early Human Development* [Internet]. 2017 Oct  
532 1;113:87–103. Available from:  
533 <https://linkinghub.elsevier.com/retrieve/pii/S0378378217303250>
- 534 59. Gao W, Alcauter S, Elton A, Hernandez-Castillo CR, Smith JK, Ramirez J, et al. Functional  
535 network development during the first year: Relative sequence and socioeconomic correlations.  
536 *Cerebral Cortex*. 2015 Sep 1;25(9):2919–28.
- 537 60. Gao W, Alcauter S, Smith JK, Gilmore JH, Lin W. Development of human brain cortical  
538 network architecture during infancy. *Brain Structure and Function*. 2015 Mar 1;220(2):1173–  
539 86.
- 540 61. Toulmin H, Beckmann CF, O’Muircheartaigh J, Ball G, Nongena P, Makropoulos A, et al.  
541 Specialization and integration of functional thalamocortical connectivity in the human infant.  
542 *Proceedings of the National Academy of Sciences of the United States of America* [Internet].  
543 2015 May 19;112(20):6485–90. Available from:  
544 <http://www.ncbi.nlm.nih.gov/pubmed/25941391>
- 545 62. Smyser CD, Inder TE, Shimony JS, Hill JE, Degnan AJ, Snyder AZ, et al. Longitudinal  
546 analysis of neural network development in preterm infants. *Cerebral cortex* (New York, NY :  
547 1991) [Internet]. 2010 Dec;20(12):2852–62. Available from:  
548 <http://www.ncbi.nlm.nih.gov/pubmed/20237243>
- 549 63. Thompson DK, Chen J, Beare R, Adamson CL, Ellis R, Ahmadzai ZM, et al. Structural  
550 connectivity relates to perinatal factors and functional impairment at 7 years in children born  
551 very preterm. *NeuroImage* [Internet]. 2016 Jul 1;134:328–37. Available from:  
552 <https://linkinghub.elsevier.com/retrieve/pii/S1053811916300143>

**An exploratory study of EEG connectivity during the first year of life in preterm and full-term infants**

- 553 64. Rogers CE, Lean RE, Wheelock MD, Smyser CD. Aberrant structural and functional  
554 connectivity and neurodevelopmental impairment in preterm children. Vol. 10, Journal of  
555 Neurodevelopmental Disorders. BioMed Central Ltd.; 2018.
- 556 65. Thatcher RW, Biver CJ, North D. Spatial-Temporal Current Source Correlations and Cortical  
557 Connectivity. *Clinical EEG and Neuroscience* [Internet]. 2007 Jan 25;38(1):35–48. Available  
558 from: <http://journals.sagepub.com/doi/10.1177/155005940703800109>
- 559 66. Meijer EJ, Hermans KHM, Zwanenburg A, Jennekens W, Niemarkt HJ, Cluitmans PJM, et al.  
560 Functional connectivity in preterm infants derived from EEG coherence analysis. *European*  
561 *Journal of Paediatric Neurology*. 2014 Nov 1;18(6):780–9.
- 562 67. González JJ, Mañas S, de Vera L, Méndez LD, López S, Garrido JM, et al. Assessment of  
563 electroencephalographic functional connectivity in term and preterm neonates. *Clinical*  
564 *Neurophysiology*. 2011 Apr;122(4):696–702.
- 565 68. Sakai T, Mikami A, Suzuki J, Miyabe-Nishiwaki T, Matsui M, Tomonaga M, et al.  
566 Developmental trajectory of the corpus callosum from infancy to the juvenile stage:  
567 Comparative MRI between chimpanzees and humans. *PLoS ONE*. 2017 Jun 1;12(6).
- 568 69. Keshavan MS, Diwadkar VA, DeBellis M, Dick E, Kotwal R, Rosenberg DR, et al.  
569 Development of the corpus callosum in childhood, adolescence and early adulthood. *Life*  
570 *Sciences* [Internet]. 2002 Mar;70(16):1909–22. Available from:  
571 <https://linkinghub.elsevier.com/retrieve/pii/S0024320502014923>
- 572 70. Hasegawa T, Yamada K, Morimoto M, Morioka S, Tozawa T, Isoda K, et al. Development of  
573 Corpus Callosum in Preterm Infants Is Affected by the Prematurity: In Vivo Assessment of  
574 Diffusion Tensor Imaging at Term-Equivalent Age. *Pediatric Research* [Internet]. 2011  
575 Mar;69(3):249–54. Available from:  
576 <http://www.nature.com/doi/10.1203/PDR.0b013e3182084e54>
- 577 71. Hinojosa-Rodríguez M, Harmony T, Carrillo-Prado C, van Horn JD, Irimia A, Torgerson C, et  
578 al. Clinical neuroimaging in the preterm infant: Diagnosis and prognosis. *NeuroImage*:  
579 *Clinical* [Internet]. 2017;16:355–68. Available from:  
580 <https://linkinghub.elsevier.com/retrieve/pii/S2213158217302061>
- 581 72. Harmony T. Early diagnosis and treatment of infants with prenatal and perinatal risk factors  
582 for brain damage at the neurodevelopmental research unit in Mexico. *NeuroImage* [Internet].  
583 2021 Jul 15;235:117984. Available from:  
584 <https://linkinghub.elsevier.com/retrieve/pii/S1053811921002615>
- 585 73. Huttenlocher PR, Dabholkar AS. Regional differences in synaptogenesis in human cerebral  
586 cortex. *The Journal of Comparative Neurology* [Internet]. 1997 Oct 20;387(2):167–78.  
587 Available from: [https://onlinelibrary.wiley.com/doi/10.1002/\(SICI\)1096-](https://onlinelibrary.wiley.com/doi/10.1002/(SICI)1096-9861(19971020)387:2<167::AID-CNE1>3.0.CO;2-Z)  
588 [9861\(19971020\)387:2<167::AID-CNE1>3.0.CO;2-Z](https://onlinelibrary.wiley.com/doi/10.1002/(SICI)1096-9861(19971020)387:2<167::AID-CNE1>3.0.CO;2-Z)
- 589 74. Lebenberg J, Mangin JF, Thirion B, Poupon C, Hertz-Pannier L, Leroy F, et al. Mapping the  
590 asynchrony of cortical maturation in the infant brain: A MRI multi-parametric clustering  
591 approach. *NeuroImage*. 2019 Jan 15;185:641–53.

- 592 75. Paus T, Collins DL, Evans AC, Leonard G, Pike B, Zijdenbos A. Maturation of white matter  
593 in the human brain: a review of magnetic resonance studies. *Brain Research Bulletin*  
594 [Internet]. 2001 Feb;54(3):255–66. Available from:  
595 <https://linkinghub.elsevier.com/retrieve/pii/S0361923000004342>
- 596 76. Woodward LJ, Clark CAC, Pritchard VE, Anderson PJ, Inder TE. Neonatal White Matter  
597 Abnormalities Predict Global Executive Function Impairment in Children Born Very Preterm.  
598 *Developmental Neuropsychology* [Internet]. 2011 Jan 25;36(1):22–41. Available from:  
599 <http://www.tandfonline.com/doi/abs/10.1080/87565641.2011.540530>
- 600 77. Otero GA, Harmony T, Pliego-Rivero FB, Ricardo-Garcell J, Bosch-Bayard J, Porcayo-  
601 Mercado R, et al. QEEG norms for the first year of life. *Early Human Development* [Internet].  
602 2011 Oct;87(10):691–703. Available from:  
603 <https://linkinghub.elsevier.com/retrieve/pii/S0378378211002003>
- 604 78. Roca-Stappung M, Moguel-González M, Fernández T, Harmony T, Mendoza-Montoya O,  
605 Marroquín JL, et al. Characterization of the Sensorimotor Rhythm in 4-Month-Old Infants  
606 Born at Term and Premature. *Applied Psychophysiology Biofeedback*. 2017 Dec 1;42(4):257–  
607 67.

608

609

## 610 **10 Supplementary Material**

611 Supplementary Material should be uploaded separately on submission, if there are Supplementary  
612 Figures, please include the caption in the same file as the figure. Supplementary Material templates  
613 can be found in the Frontiers Word Templates file.

614 Please see the [Supplementary Material section of the Author guidelines](#) for details on the different file  
615 types accepted.

## 616 **11 Data Availability Statement**

617 The datasets [GENERATED/ANALYZED] for this study can be found in the [NAME OF  
618 REPOSITORY] [LINK]. Please see the [Data Availability section of the Author guidelines](#) for more  
619 details.

620

621 **Table 1. Demographic information for full term and preterm infants.**

| Age Group                 | N  | Sex (females) | EEGs | GA (wks)   |
|---------------------------|----|---------------|------|------------|
| Term                      | 71 | 29            | 82   | 40 (38-41) |
| Moderate and Late preterm | 54 | 25            | 112  | 35 (32-37) |



**An exploratory study of EEG connectivity during the first year of life in preterm and full-term infants**

|              |    |    |     |            |
|--------------|----|----|-----|------------|
| Very preterm | 56 | 27 | 103 | 29 (27-31) |
|--------------|----|----|-----|------------|

622

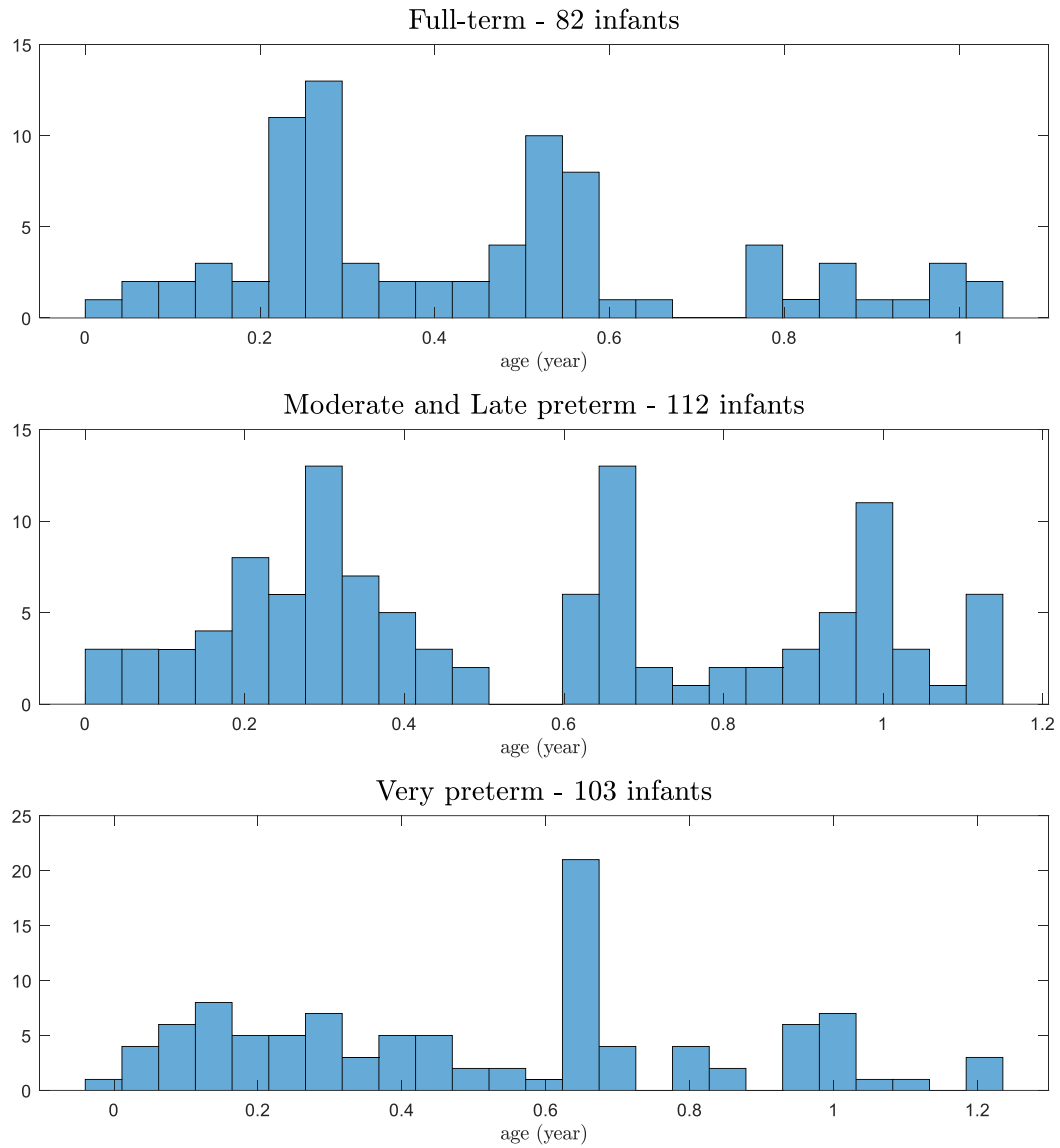

*Fig 1: Histogram by age groups showing some small gaps along the first year on EEG data recordings.*

623

## An exploratory study of EEG connectivity during the first year of life in preterm and full-term infants

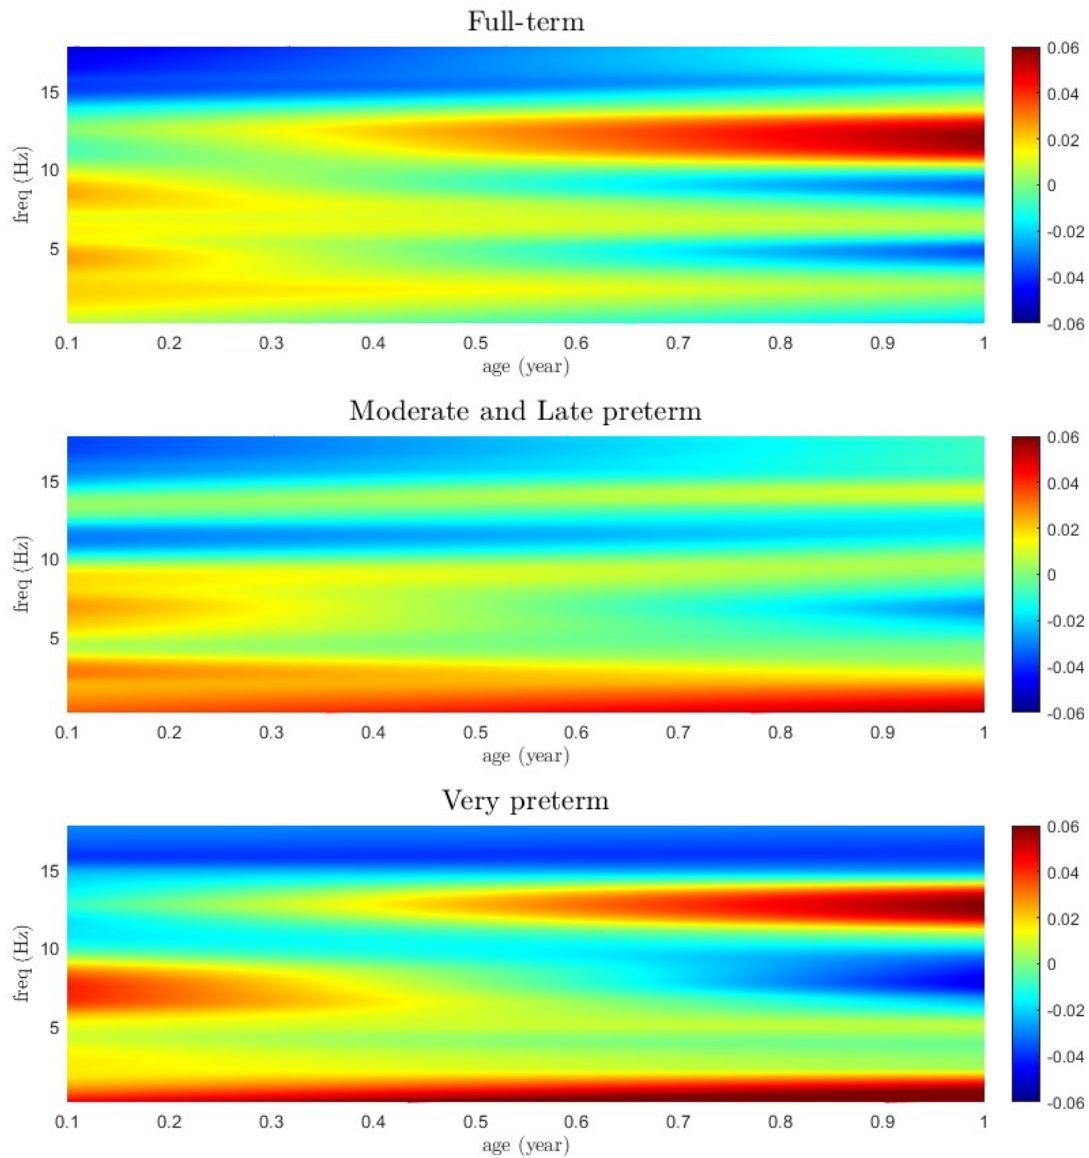

**Fig 2:** Global connectivity pattern for the three groups of infants: full term, late preterm, and very preterm.

624

625

## An exploratory study of EEG connectivity during the first year of life in preterm and full-term infants

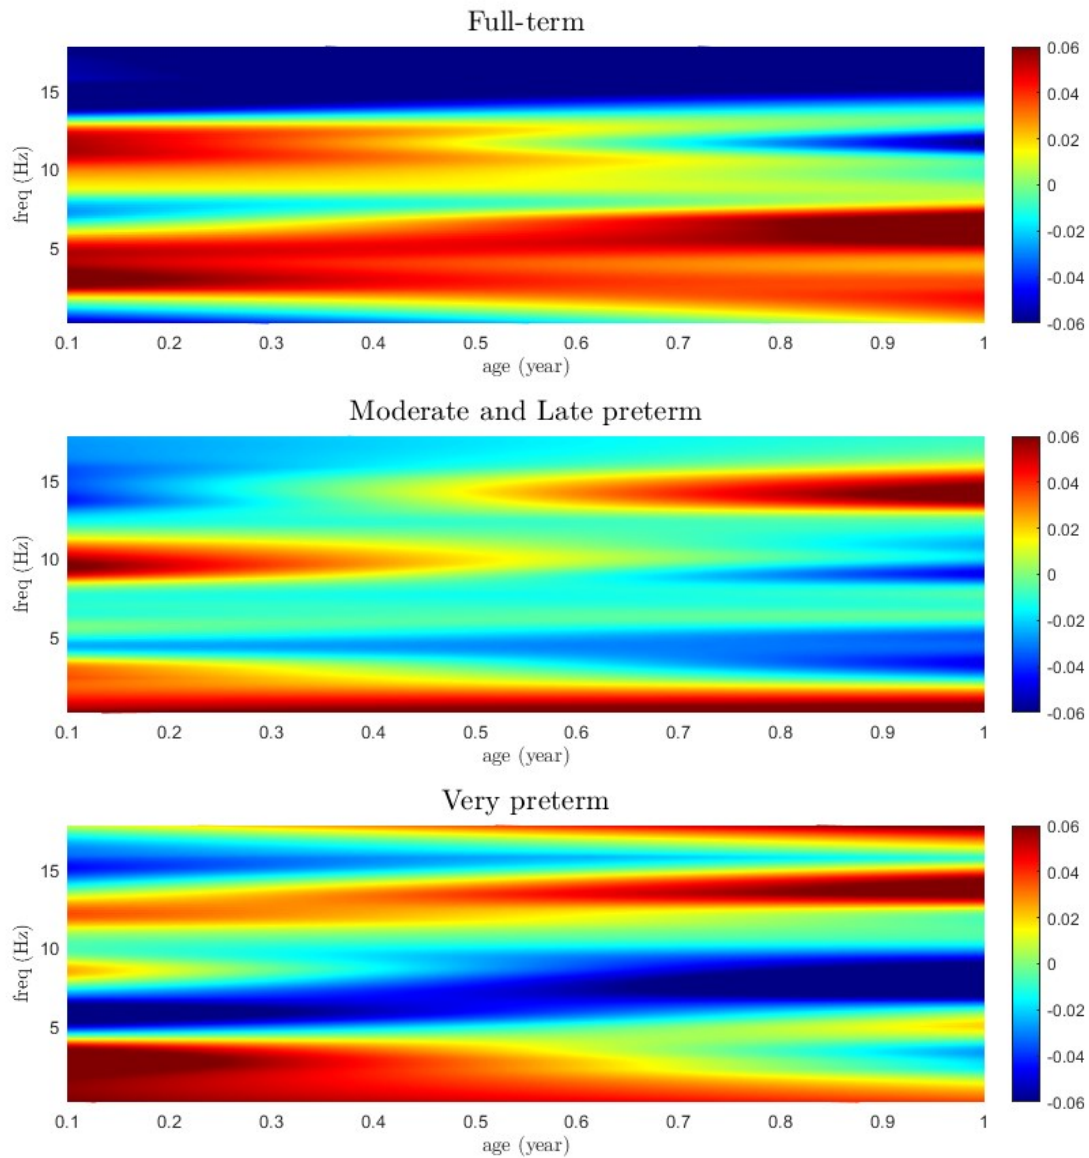

**Fig 3:** Local connectivity pattern for the three groups of infants (full term, late preterm, and very preterm) at frontal cortical regions.

626

627

## An exploratory study of EEG connectivity during the first year of life in preterm and full-term infants

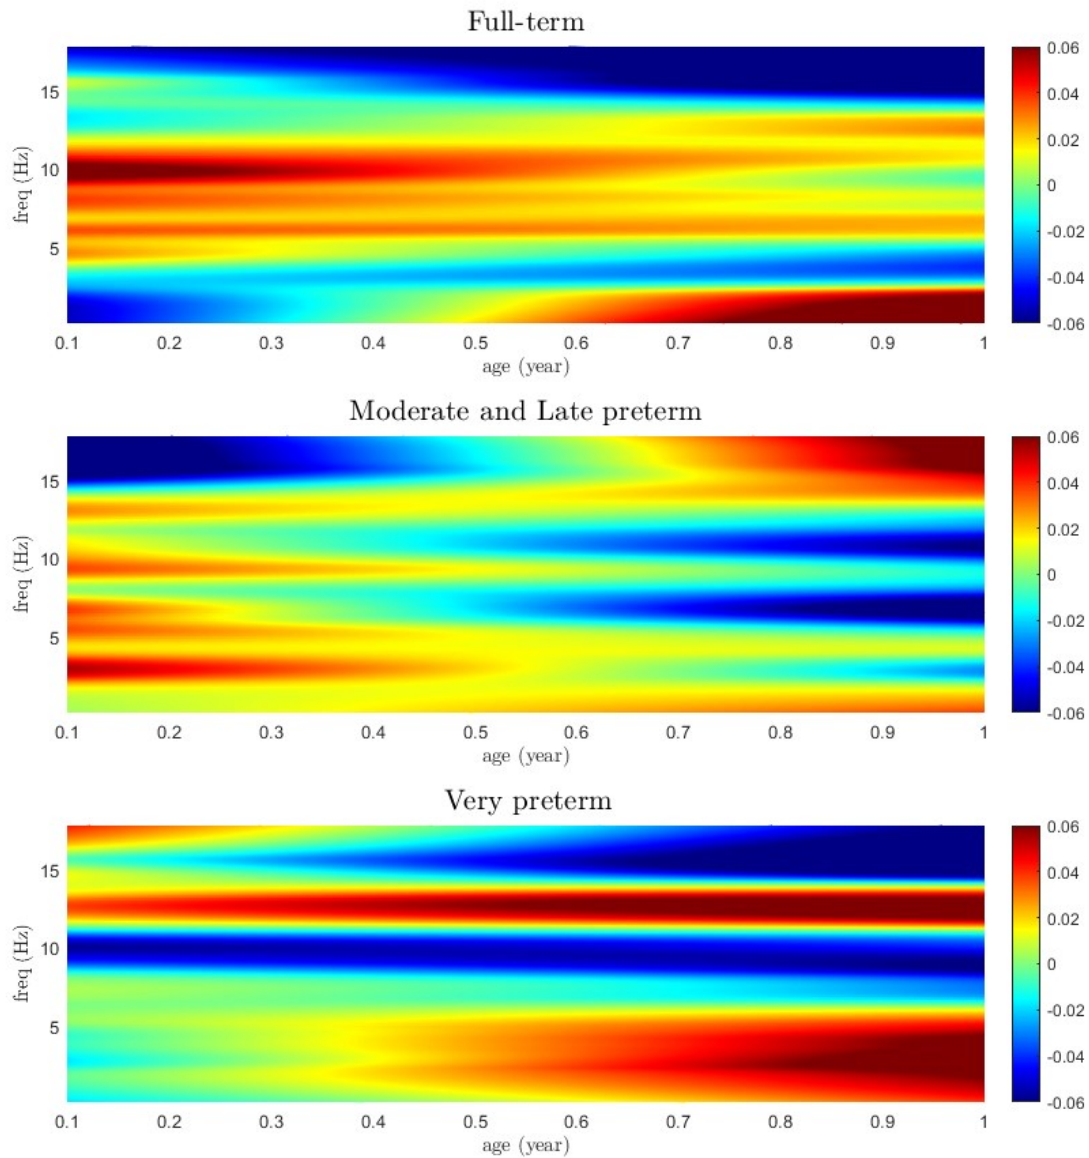

**Fig 4:** Local connectivity pattern for the three groups of infants (full term, late preterm, and very preterm) at sensorimotor cortical regions.

628

## An exploratory study of EEG connectivity during the first year of life in preterm and full-term infants

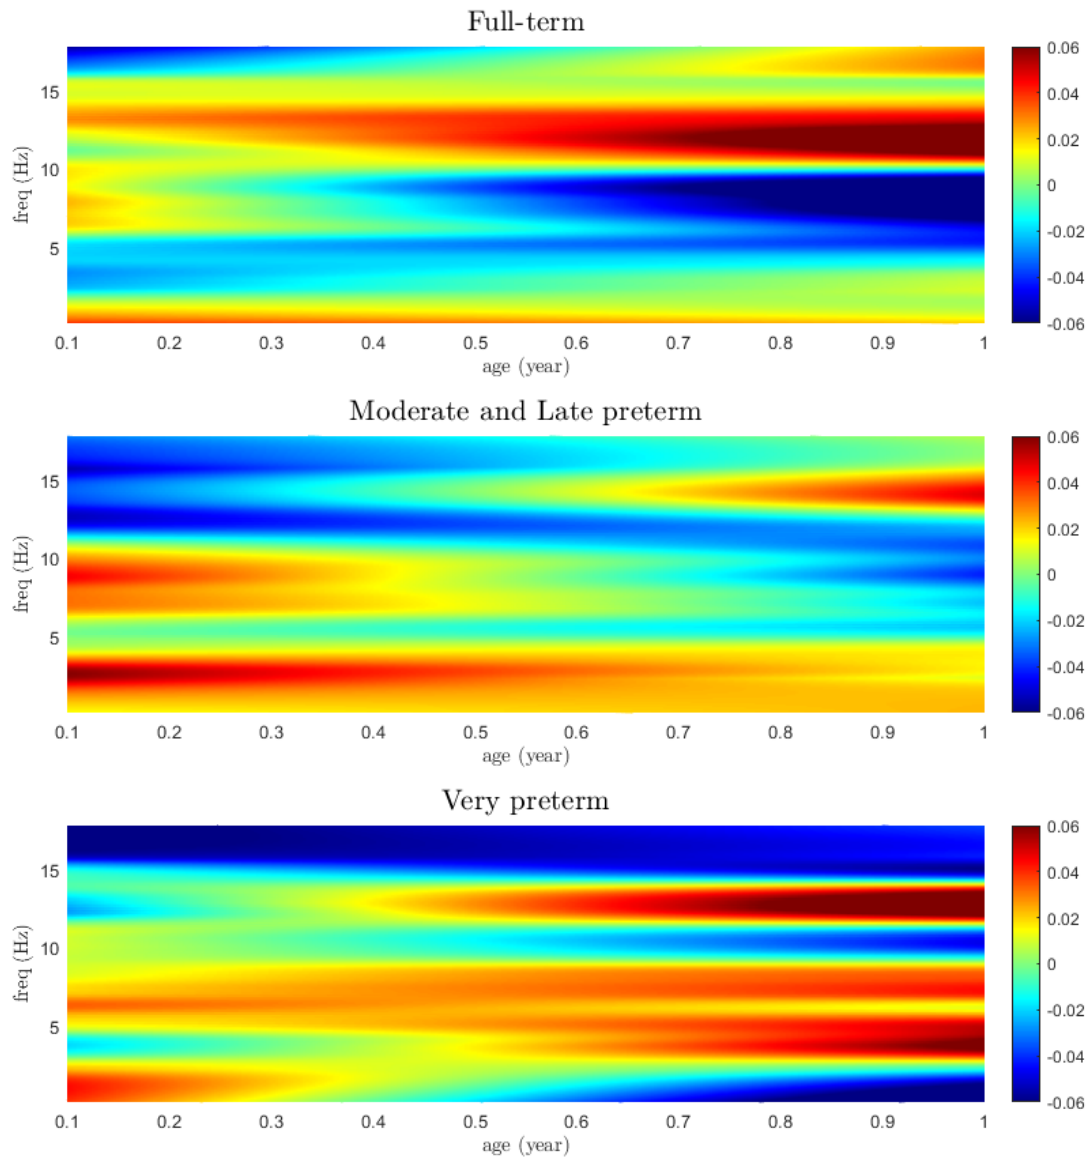

**Fig 5:** Local connectivity pattern for the three groups of infants (full term, late preterm, and very preterm) at parietal cortical regions.

## An exploratory study of EEG connectivity during the first year of life in preterm and full-term infants

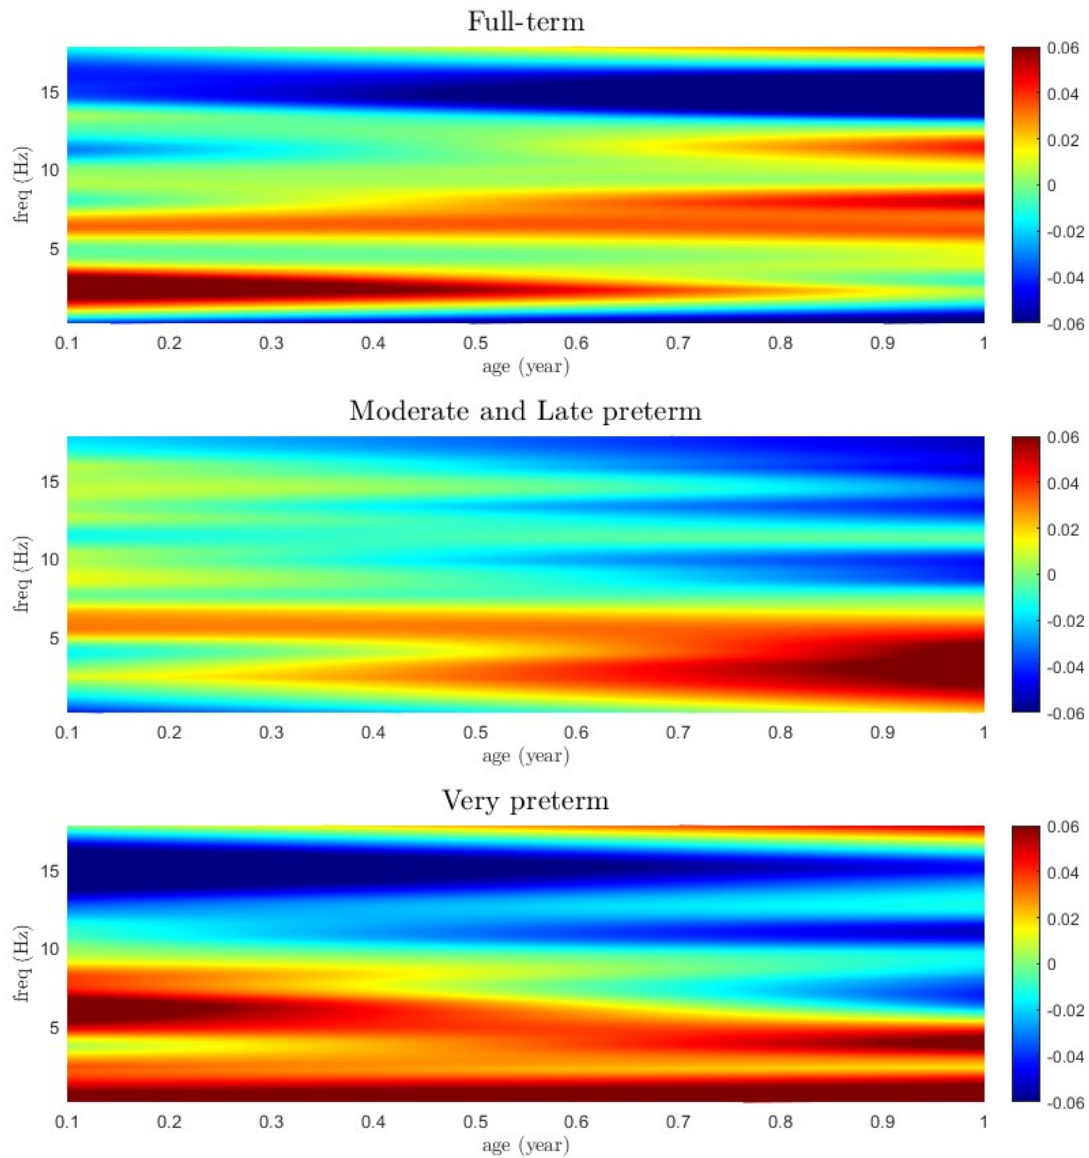

**Fig 6:** Local connectivity pattern for the three groups of infants (full term, late preterm, and very preterm) at temporal cortical regions.

630

## An exploratory study of EEG connectivity during the first year of life in preterm and full-term infants

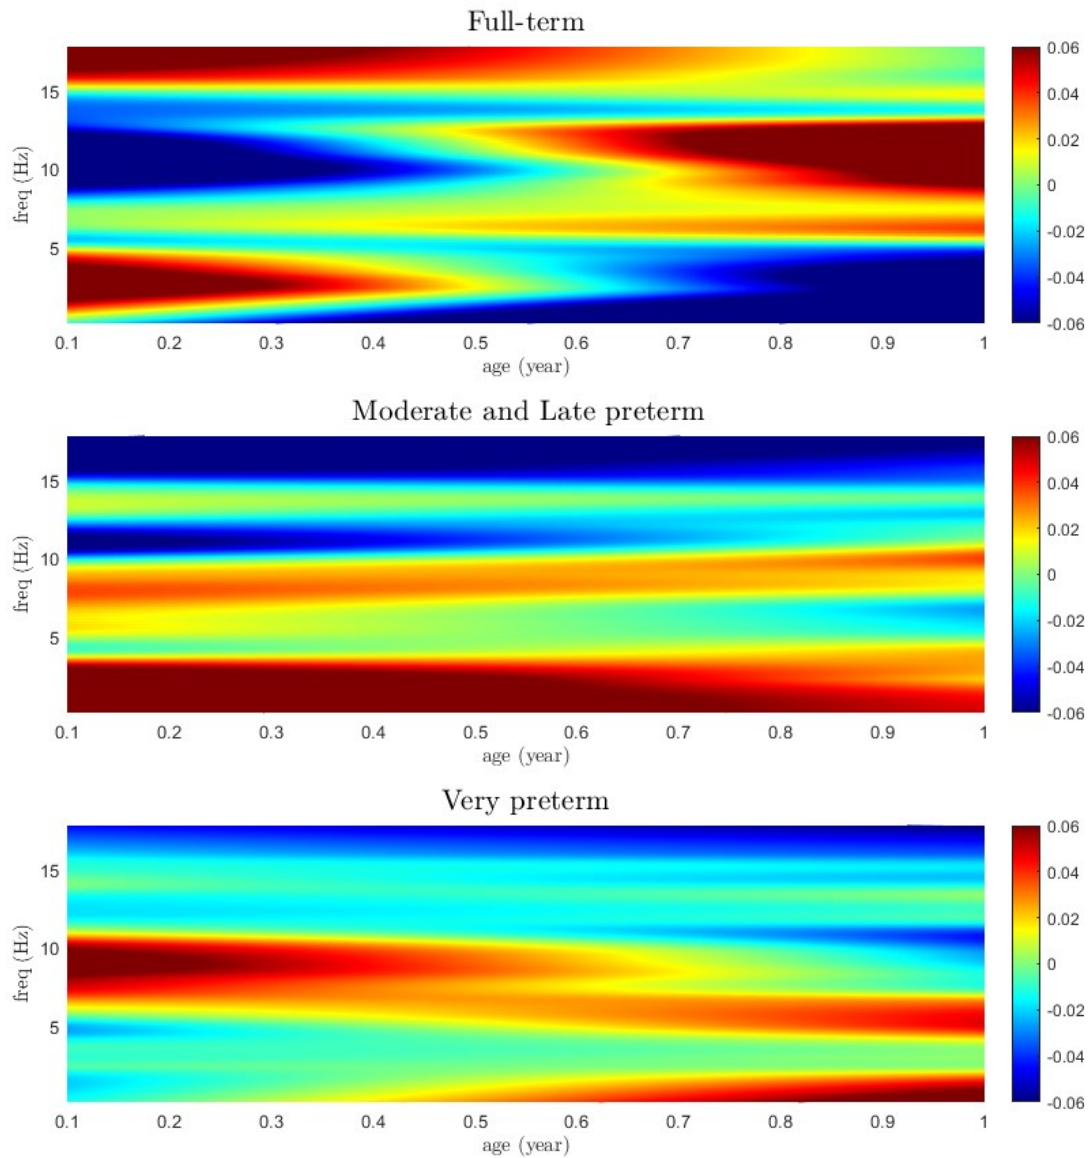

**Fig 7:** Local connectivity pattern for the three groups of infants (full term, late preterm, and very preterm) at sensorimotor occipital regions.
